# Supplementary material
Source: Frontiers journal article supplement (https://www.frontiersin.org/articles/487128)
Supplement: Data_Sheet_3.PDF [file Data_Sheet_3.PDF]

| Null Hypothesis                                                                     | Significance (p value) |              |               | Decision                    |
|-------------------------------------------------------------------------------------|------------------------|--------------|---------------|-----------------------------|
|                                                                                     | WHO Grade I            | WHO Grade II | WHO Grade III |                             |
| 1 The distribution of minValue is the same across categories of Authors.            | 0.363                  | 0.539        | 0.847         | Retain the null hypothesis. |
| 2 The distribution of meanValue is the same across categories of Authors.           | 0.593                  | 0.782        | 0.290         | Retain the null hypothesis. |
| 3 The distribution of stdValue is the same across categories of Authors.            | 0.251                  | 0.434        | 0.400         | Retain the null hypothesis. |
| 4 The distribution of maxValue is the same across categories of Authors.            | 0.316                  | 0.365        | 0.186         | Retain the null hypothesis. |
| 5 The distribution of HISTO_Skewness is the same across categories of Authors.      | 0.569                  | 0.782        | 0.813         | Retain the null hypothesis. |
| 6 The distribution of HISTO_Kurtosis is the same across categories of Authors.      | 0.313                  | 0.529        | 0.914         | Retain the null hypothesis. |
| 7 The distribution of HISTO_Entropy_log10 is the same across categories of Authors. | 0.334                  | 0.438        | 0.621         | Retain the null hypothesis. |
| 8 The distribution of HISTO_Energy is the same across categories of Authors.        | 0.337                  | 0.412        | 0.813         | Retain the null hypothesis. |
| 9 The distribution of SHAPE_Volume (mL) is the same across categories of Authors.   | 0.116                  | 0.679        | 0.477         | Retain the null hypothesis. |
| 10 The distribution of GLCM_Homogeneity is the same across categories of Authors.   | 0.223                  | 0.214        | 0.505         | Retain the null hypothesis. |
| 11 The distribution of GLCM_Energy is the same across categories of Authors.        | 0.784                  | 0.476        | 0.451         | Retain the null hypothesis. |
| 12 The distribution of GLCM_Contrast is the same across categories of Authors.      | 0.134                  | 0.342        | 0.591         | Retain the null hypothesis. |
| 13 The distribution of GLCM_Correlation is the same across categories of Authors.   | 0.063                  | 0.462        | 0.533         | Retain the null hypothesis. |
| 14 The distribution of GLCM_Entropy_log10 is the same across categories of Authors. | 0.665                  | 0.311        | 0.561         | Retain the null hypothesis. |
| 15 The distribution of GLCM_Dissimilarity is the same across categories of Authors. | 0.180                  | 0.297        | 0.533         | Retain the null hypothesis. |
| 16 The distribution of GLRLM_SRE is the same across categories of Authors.          | 0.399                  | 0.480        | 0.331         | Retain the null hypothesis. |
| 17 The distribution of GLRLM_LRE is the same across categories of Authors.          | 0.670                  | 0.957        | 0.377         | Retain the null hypothesis. |
| 18 The distribution of GLRLM_LGRE is the same across categories of Authors.         | 0.121                  | 0.104        | 0.354         | Retain the null hypothesis. |
| 19 The distribution of GLRLM_HGRE is the same across categories of Authors.         | 0.902                  | 0.090        | 0.331         | Retain the null hypothesis. |
| 20 The distribution of GLRLM_SRLGE is the same across categories of Authors.        | 0.149                  | 0.111        | 0.331         | Retain the null hypothesis. |
| 21 The distribution of GLRLM_SRHGE is the same across categories of Authors.        | 0.937                  | 0.102        | 0.354         | Retain the null hypothesis. |
| 22 The distribution of GLRLM_LRLGE is the same across categories of Authors.        | 0.126                  | 0.407        | 0.533         | Retain the null hypothesis. |
| 23 The distribution of GLRLM_LRHGE is the same across categories of Authors.        | 0.670                  | 0.099        | 0.400         | Retain the null hypothesis. |
| 24 The distribution of GLRLM_GLNU is the same across categories of Authors.         | 0.729                  | 0.591        | 0.400         | Retain the null hypothesis. |
| 25 The distribution of GLRLM_RLNU is the same across categories of Authors.         | 0.530                  | 0.519        | 0.400         | Retain the null hypothesis. |
| 26 The distribution of GLRLM_RP is the same across categories of Authors.           | 0.449                  | 0.326        | 0.377         | Retain the null hypothesis. |
| 27 The distribution of NGLDM_Coarseness is the same across categories of Authors.   | 0.226                  | 0.921        | 0.533         | Retain the null hypothesis. |
| 28 The distribution of NGLDM_Contrast is the same across categories of Authors.     | 0.395                  | 0.290        | 0.747         | Retain the null hypothesis. |
| 29 The distribution of NGLDM_Busyness is the same across categories of Authors.     | 0.292                  | 0.866        | 0.715         | Retain the null hypothesis. |
| 30 The distribution of GLZLM_SZE is the same across categories of Authors.          | 0.806                  | 0.933        | 0.715         | Retain the null hypothesis. |
| 31 The distribution of GLZLM_LZE is the same across categories of Authors.          | 0.458                  | 0.293        | 0.310         | Retain the null hypothesis. |
| 32 The distribution of GLZLM_LGZE is the same across categories of Authors.         | 0.292                  | 0.061        | 0.310         | Retain the null hypothesis. |
| 33 The distribution of GLZLM_HGZE is the same across categories of Authors.         | 0.649                  | 0.231        | 0.290         | Retain the null hypothesis. |
| 34 The distribution of GLZLM_SZLGE is the same across categories of Authors.        | 0.834                  | 0.075        | 0.354         | Retain the null hypothesis. |
| 35 The distribution of GLZLM_SZHGE is the same across categories of Authors.        | 0.665                  | 0.645        | 0.310         | Retain the null hypothesis. |
| 36 The distribution of GLZLM_LZLGE is the same across categories of Authors.        | 0.692                  | 0.137        | 0.747         | Retain the null hypothesis. |
| 37 The distribution of GLZLM_LZHGE is the same across categories of Authors.        | 0.348                  | 0.529        | 0.270         | Retain the null hypothesis. |
| 38 The distribution of GLZLM_GLNU is the same across categories of Authors.         | 0.267                  | 0.724        | 0.621         | Retain the null hypothesis. |
| 39 The distribution of GLZLM_ZLNU is the same across categories of Authors.         | 0.296                  | 0.747        | 0.652         | Retain the null hypothesis. |
| 40 The distribution of GLZLM_ZP is the same across categories of Authors.           | 0.415                  | 0.495        | 0.377         | Retain the null hypothesis. |
